# Supplementary material
Source: Springer Nature journal article supplement (https://www.springermedizin.de/resource/supplementary/13023_2013_668_MOESM11_ESM.pdf/9642528)
Supplement: MOESM11 [file 9642528]

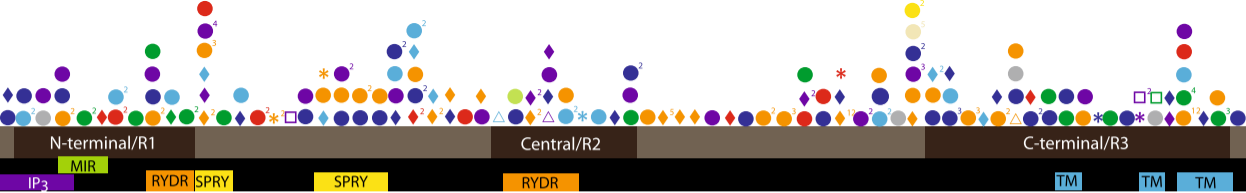

### Domain KEY

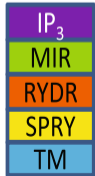

N-terminal/Region I: Exons 2-17  
 Central/Region II: Exons 39-46  
 C-terminal/Region III: Exons 85-103

- Missense
- ◆ Nonsense
- Deletion
- Insertion
- △ Duplication
- \* Splice Site

- MmD
- CCD
- Core Myopathy
- CNM/CNM-like
- CFTD
- RRM
- KDS
- Congenital Myopathy/MH
- AR MD
- Core/Rod Disease
